# Supplementary material for: Identification of Differentially Expressed Genes and miRNAs Associated with Esophageal Squamous Cell Carcinoma by Integrated Analysis of Microarray Data
Source: Hindawi journal article supplement (doi:10.1155/2020/1980921), 2020-01-01
Supplement: f1 [file 1980921.f1.pdf]

Supplementary table1 85 miRNAs significantly correlated with prognosis

| <b>miRNA</b>    | <b>P value</b> | <b>miRNA</b>      | <b>P value</b> |
|-----------------|----------------|-------------------|----------------|
| hsa-miR-199a-5p | 0.0220         | hsa-miR-181a-2-3p | 0.0061         |
| hsa-miR-361-3p  | 0.0373         | hsa-miR-181b-5p   | 0.0046         |
| hsa-miR-362-5p  | 0.0045         | hsa-miR-181c-3p   | 0.0398         |
| hsa-miR-330-5p  | 0.0247         | hsa-miR-187-3p    | 0.0172         |
| hsa-miR-331-3p  | 0.0288         | hsa-miR-214-5p    | 0.0480         |
| hsa-miR-324-5p  | 0.0085         | hsa-miR-214-3p    | 0.0447         |
| hsa-miR-324-3p  | 0.0387         | hsa-miR-223-3p    | 0.0020         |
| hsa-miR-339-5p  | 0.0413         | hsa-let-7i-5p     | 0.0448         |
| hsa-miR-423-5p  | 0.0124         | hsa-miR-128-3p    | 0.0165         |
| hsa-miR-484     | 0.0153         | hsa-miR-132-5p    | 0.0011         |
| hsa-miR-491-5p  | 0.0426         | hsa-miR-132-3p    | 0.0123         |
| hsa-miR-146b-5p | 0.0067         | hsa-miR-9-5p      | 0.0086         |
| hsa-miR-146b-3p | 0.0320         | hsa-miR-9-3p      | 0.0003         |
| hsa-miR-512-3p  | 0.0088         | hsa-miR-154-3p    | 0.0237         |
| hsa-miR-501-5p  | 0.0288         | hsa-miR-185-3p    | 0.0072         |
| hsa-miR-502-5p  | 0.0452         | hsa-miR-194-3p    | 0.0260         |
| hsa-miR-615-3p  | 0.0371         | hsa-miR-106b-3p   | 0.0291         |
| hsa-miR-421     | 0.0050         | hsa-miR-200a-5p   | 0.0138         |
| hsa-miR-767-5p  | 0.0030         | hsa-miR-130b-5p   | 0.0233         |
| hsa-miR-769-3p  | 0.0206         | hsa-miR-130b-3p   | 0.0412         |
| hsa-miR-450b-5p | 0.0114         | hsa-miR-345-5p    | 0.0163         |
| hsa-miR-940     | 0.0414         | hsa-miR-196b-5p   | 0.0133         |
| hsa-miR-1291    | 0.0000         | hsa-miR-425-5p    | 0.0002         |
| hsa-miR-1248    | 0.0000         | hsa-miR-425-3p    | 0.0151         |
| hsa-miR-1270    | 0.0180         | hsa-miR-431-3p    | 0.0145         |

|                  |        |                 |        |
|------------------|--------|-----------------|--------|
| hsa-let-7f-5p    | 0.0442 | hsa-miR-487a-3p | 0.0340 |
| hsa-miR-17-5p    | 0.0060 | hsa-miR-503-5p  | 0.0093 |
| hsa-miR-18a-5p   | 0.0065 | hsa-miR-505-5p  | 0.0014 |
| hsa-miR-18a-3p   | 0.0388 | hsa-miR-505-3p  | 0.0047 |
| <hr/>            |        |                 |        |
| hsa-miR-21-5p    | 0.0096 | hsa-miR-92b-5p  | 0.0344 |
| hsa-miR-21-3p    | 0.0204 | hsa-miR-629-5p  | 0.0111 |
| hsa-miR-22-3p    | 0.0282 | hsa-miR-629-3p  | 0.0294 |
| hsa-miR-25-3p    | 0.0229 | hsa-miR-652-3p  | 0.0290 |
| hsa-miR-27a-3p   | 0.0085 | hsa-miR-1301-3p | 0.0015 |
| hsa-miR-92a-1-5p | 0.0188 | hsa-miR-675-3p  | 0.0274 |
| hsa-miR-93-5p    | 0.0370 | hsa-miR-939-5p  | 0.0353 |
| hsa-miR-93-3p    | 0.0179 | hsa-miR-1180-3p | 0.0266 |
| hsa-miR-105-5p   | 0.0024 | hsa-miR-1226-3p | 0.0073 |
| hsa-miR-196a-5p  | 0.0365 | hsa-miR-1287-5p | 0.0393 |
| hsa-miR-197-3p   | 0.0085 | hsa-miR-1292-5p | 0.0020 |
| hsa-miR-30c-5p   | 0.0078 | hsa-miR-1307-3p | 0.0003 |
| hsa-miR-7-5p     | 0.0004 | hsa-miR-3200-3p | 0.0194 |
| hsa-miR-181a-5p  | 0.0273 |                 |        |

---
